# Supplementary material
Source: publisher site journal article supplement (https://www.dovepress.com/article/613184)
Supplement: Supplementary file 1 [file 613184%20Revised%20Supplementary%20Material.docx]

**Table S1** Sensitivity analysis of associations between PA and anxiety after excluding outliers defined by the IQR method

| **Variables** | **Crude** | | **Model 1** | | **Model 2** | |
| --- | --- | --- | --- | --- | --- | --- |
| **OR (95% CI)** | ***P*** | **OR (95% CI)** | ***P*** | **OR (95% CI)** | ***P*** |
| TPA | 1.34 (1.22, 1.46) | <0.001 | 1.29 (1.17, 1.41) | <0.001 | 1.25 (1.13, 1.38) | <0.001 |
| T1 | 1(Ref) |  | 1(Ref) |  | 1(Ref) |  |
| T2 | 0.94 (0.75, 1.18) | 0.618 | 0.89 (0.71, 1.12) | 0.309 | 0.84 (0.66, 1.08) | 0.17 |
| T3 | 1.65 (1.34, 2.03) | <0.001 | 1.46 (1.18, 1.81) | <0.001 | 1.37 (1.08, 1.73) | 0.008 |
|  |  |  |  |  |  |  |
| OPA | 1.26 (1.16, 1.38) | <0.001 | 1.29 (1.18, 1.41) | <0.001 | 1.24 (1.12, 1.37) | <0.001 |
| T1 | 1(Ref) |  | 1(Ref) |  | 1(Ref) |  |
| T2 | 0.98 (0.75, 1.26) | 0.861 | 0.97 (0.74, 1.26) | 0.82 | 0.94 (0.7, 1.25) | 0.658 |
| T3 | 1.34 (1.1, 1.63) | 0.004 | 1.35 (1.1, 1.66) | 0.004 | 1.24 (0.99, 1.56) | 0.06 |
|  |  |  |  |  |  |  |
| HPA | 1.16 (1.07, 1.27) | <0.001 | 1.09 (0.99, 1.19) | 0.074 | 1.11 (1, 1.22) | 0.044 |
| T1 | 1(Ref) |  | 1(Ref) |  | 1(Ref) |  |
| T2 | 1.05 (0.84, 1.32) | 0.675 | 0.96 (0.76, 1.21) | 0.711 | 0.97 (0.76, 1.25) | 0.817 |
| T3 | 1.4 (1.14, 1.72) | 0.001 | 1.18 (0.94, 1.46) | 0.148 | 1.24 (0.98, 1.57) | 0.077 |
|  |  |  |  |  |  |  |
| LTPA | 0.9 (0.83, 0.97) | 0.008 | 0.89 (0.82, 0.97) | 0.007 | 0.89 (0.81, 0.97) | 0.009 |
| T1 | 1(Ref) |  | 1(Ref) |  | 1(Ref) |  |
| T2 | 0.54 (0.23, 1.27) | 0.158 | 0.55 (0.23, 1.32) | 0.182 | 0.61 (0.25, 1.5) | 0.28 |
| T3 | 0.81 (0.65, 1) | 0.047 | 0.8 (0.64, 0.99) | 0.039 | 0.74 (0.59, 0.94) | 0.014 |

**Notes:** BMI, body mass index; TPA, total physical activity; OPA, occupational physical activity; HPA, household physical activity; LTPA, leisure-time physical activity. For the continuous variables TPA, OPA, HPA, and LTPA, the odds ratios (ORs) and 95% confidence intervals (CIs) are presented per 1‑SD increment. Crude: no adjusted. Model 1: age, sex. Model 2: age, sex, marital status, education, BMI, length of sleep, pack-years of smoking, alcohol drinking, psychological stress, hypertension, diabetes, heart disease, MLR.


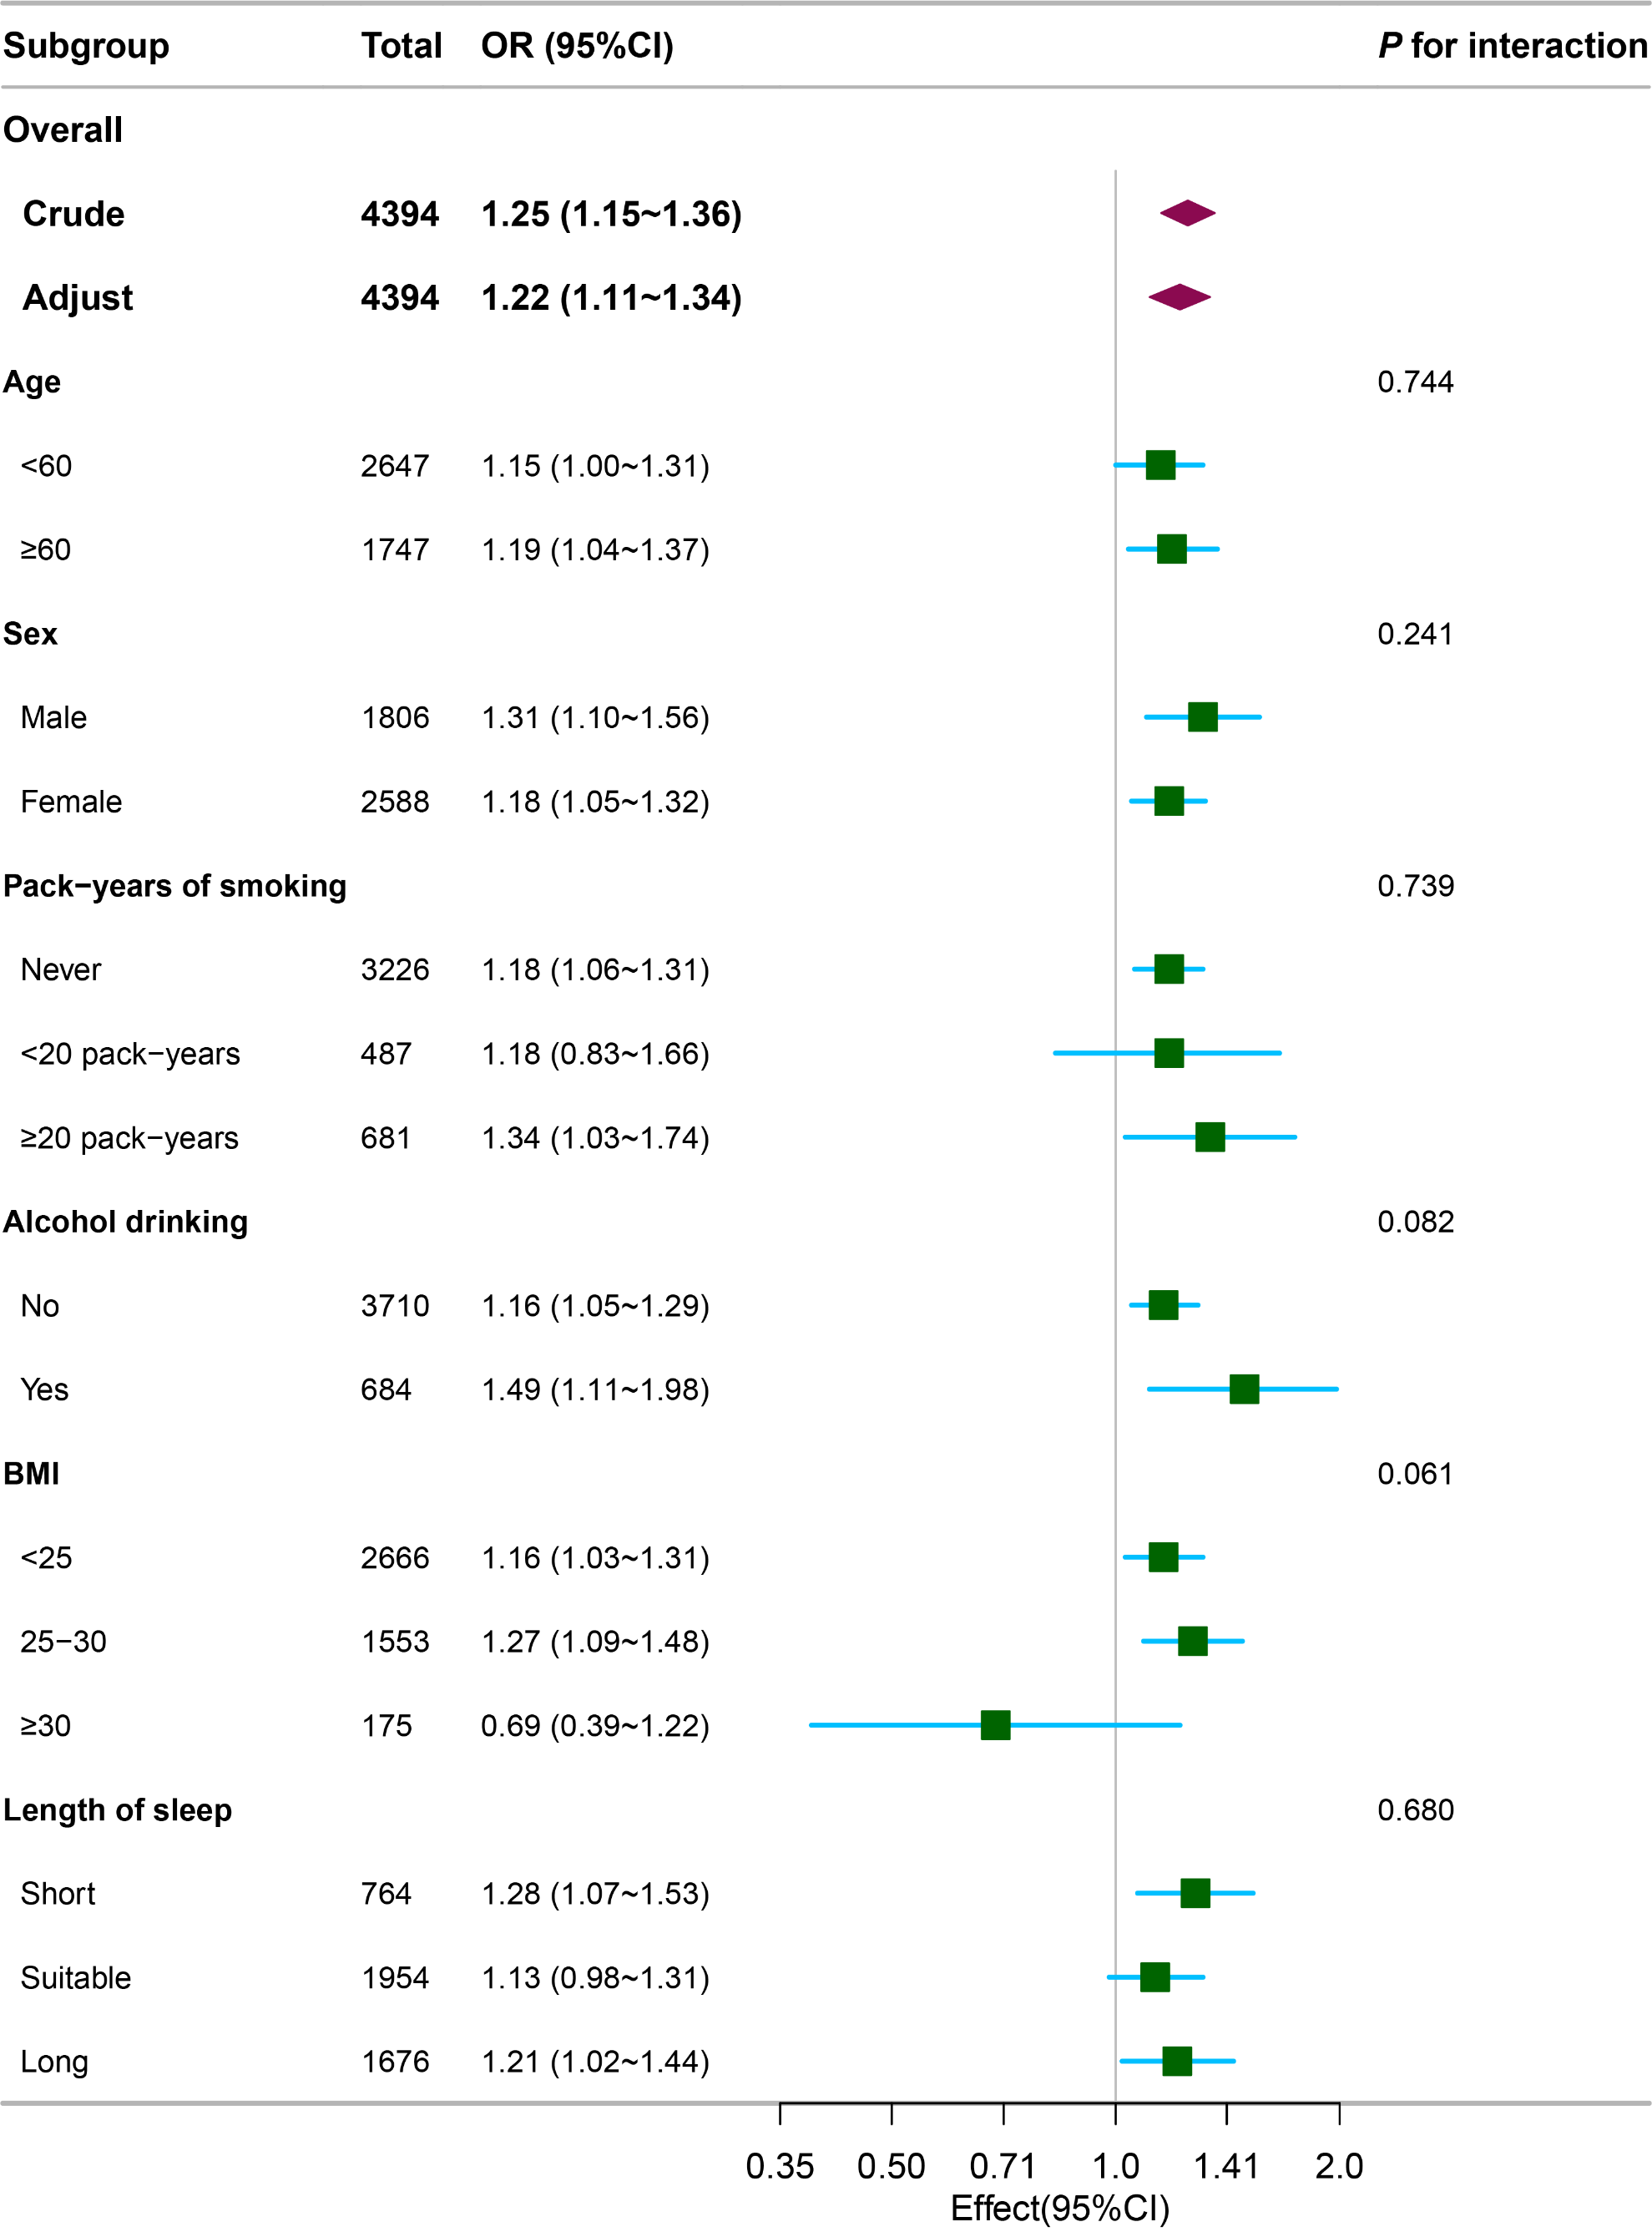


**Figure S1** Association between OPA and anxiety.

Each stratification was adjusted for age, sex, marital status, education, BMI, length of sleep, pack-years of smoking, alcohol drinking, psychological stress, hypertension, diabetes, heart disease, MLR except the stratification factor itself. Bold font indicates the overall effect and each subgroup itself.


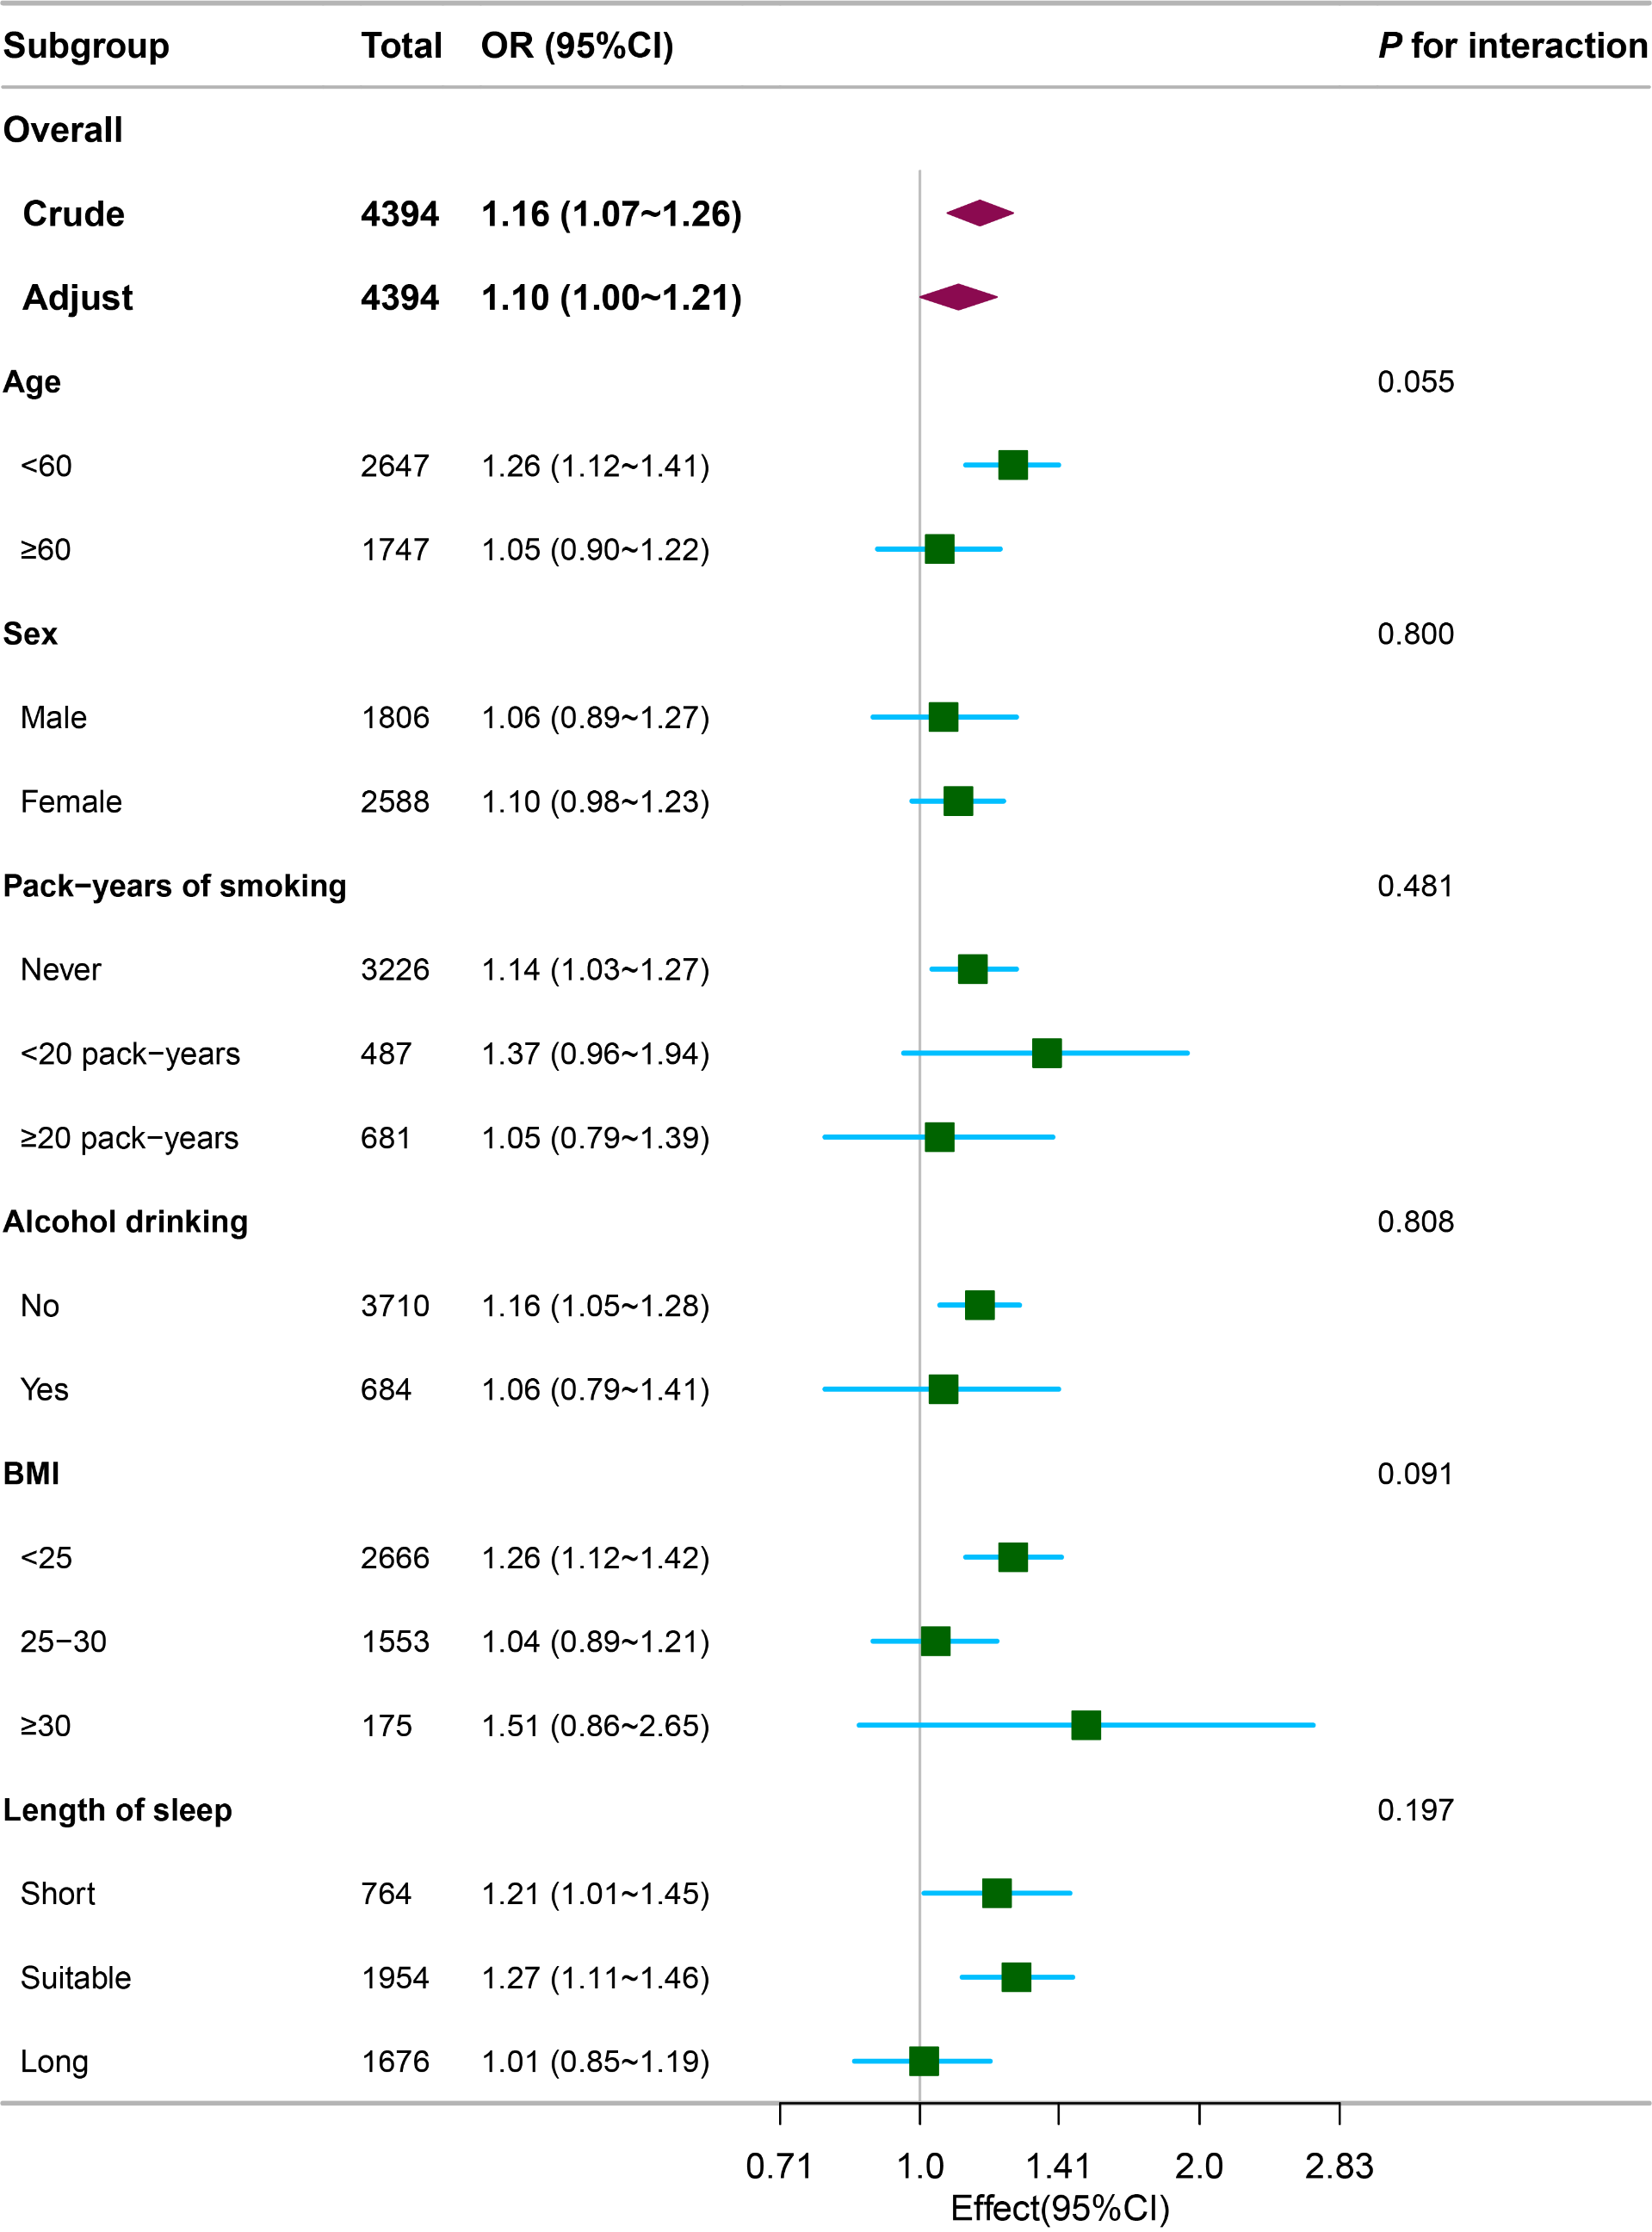


**Figure S2** Association between HPA and anxiety.

Each stratification was adjusted for age, sex, marital status, education, BMI, length of sleep, pack-years of smoking, alcohol drinking, psychological stress, hypertension, diabetes, heart disease, MLR except the stratification factor itself. Bold font indicates the overall effect and each subgroup itself.


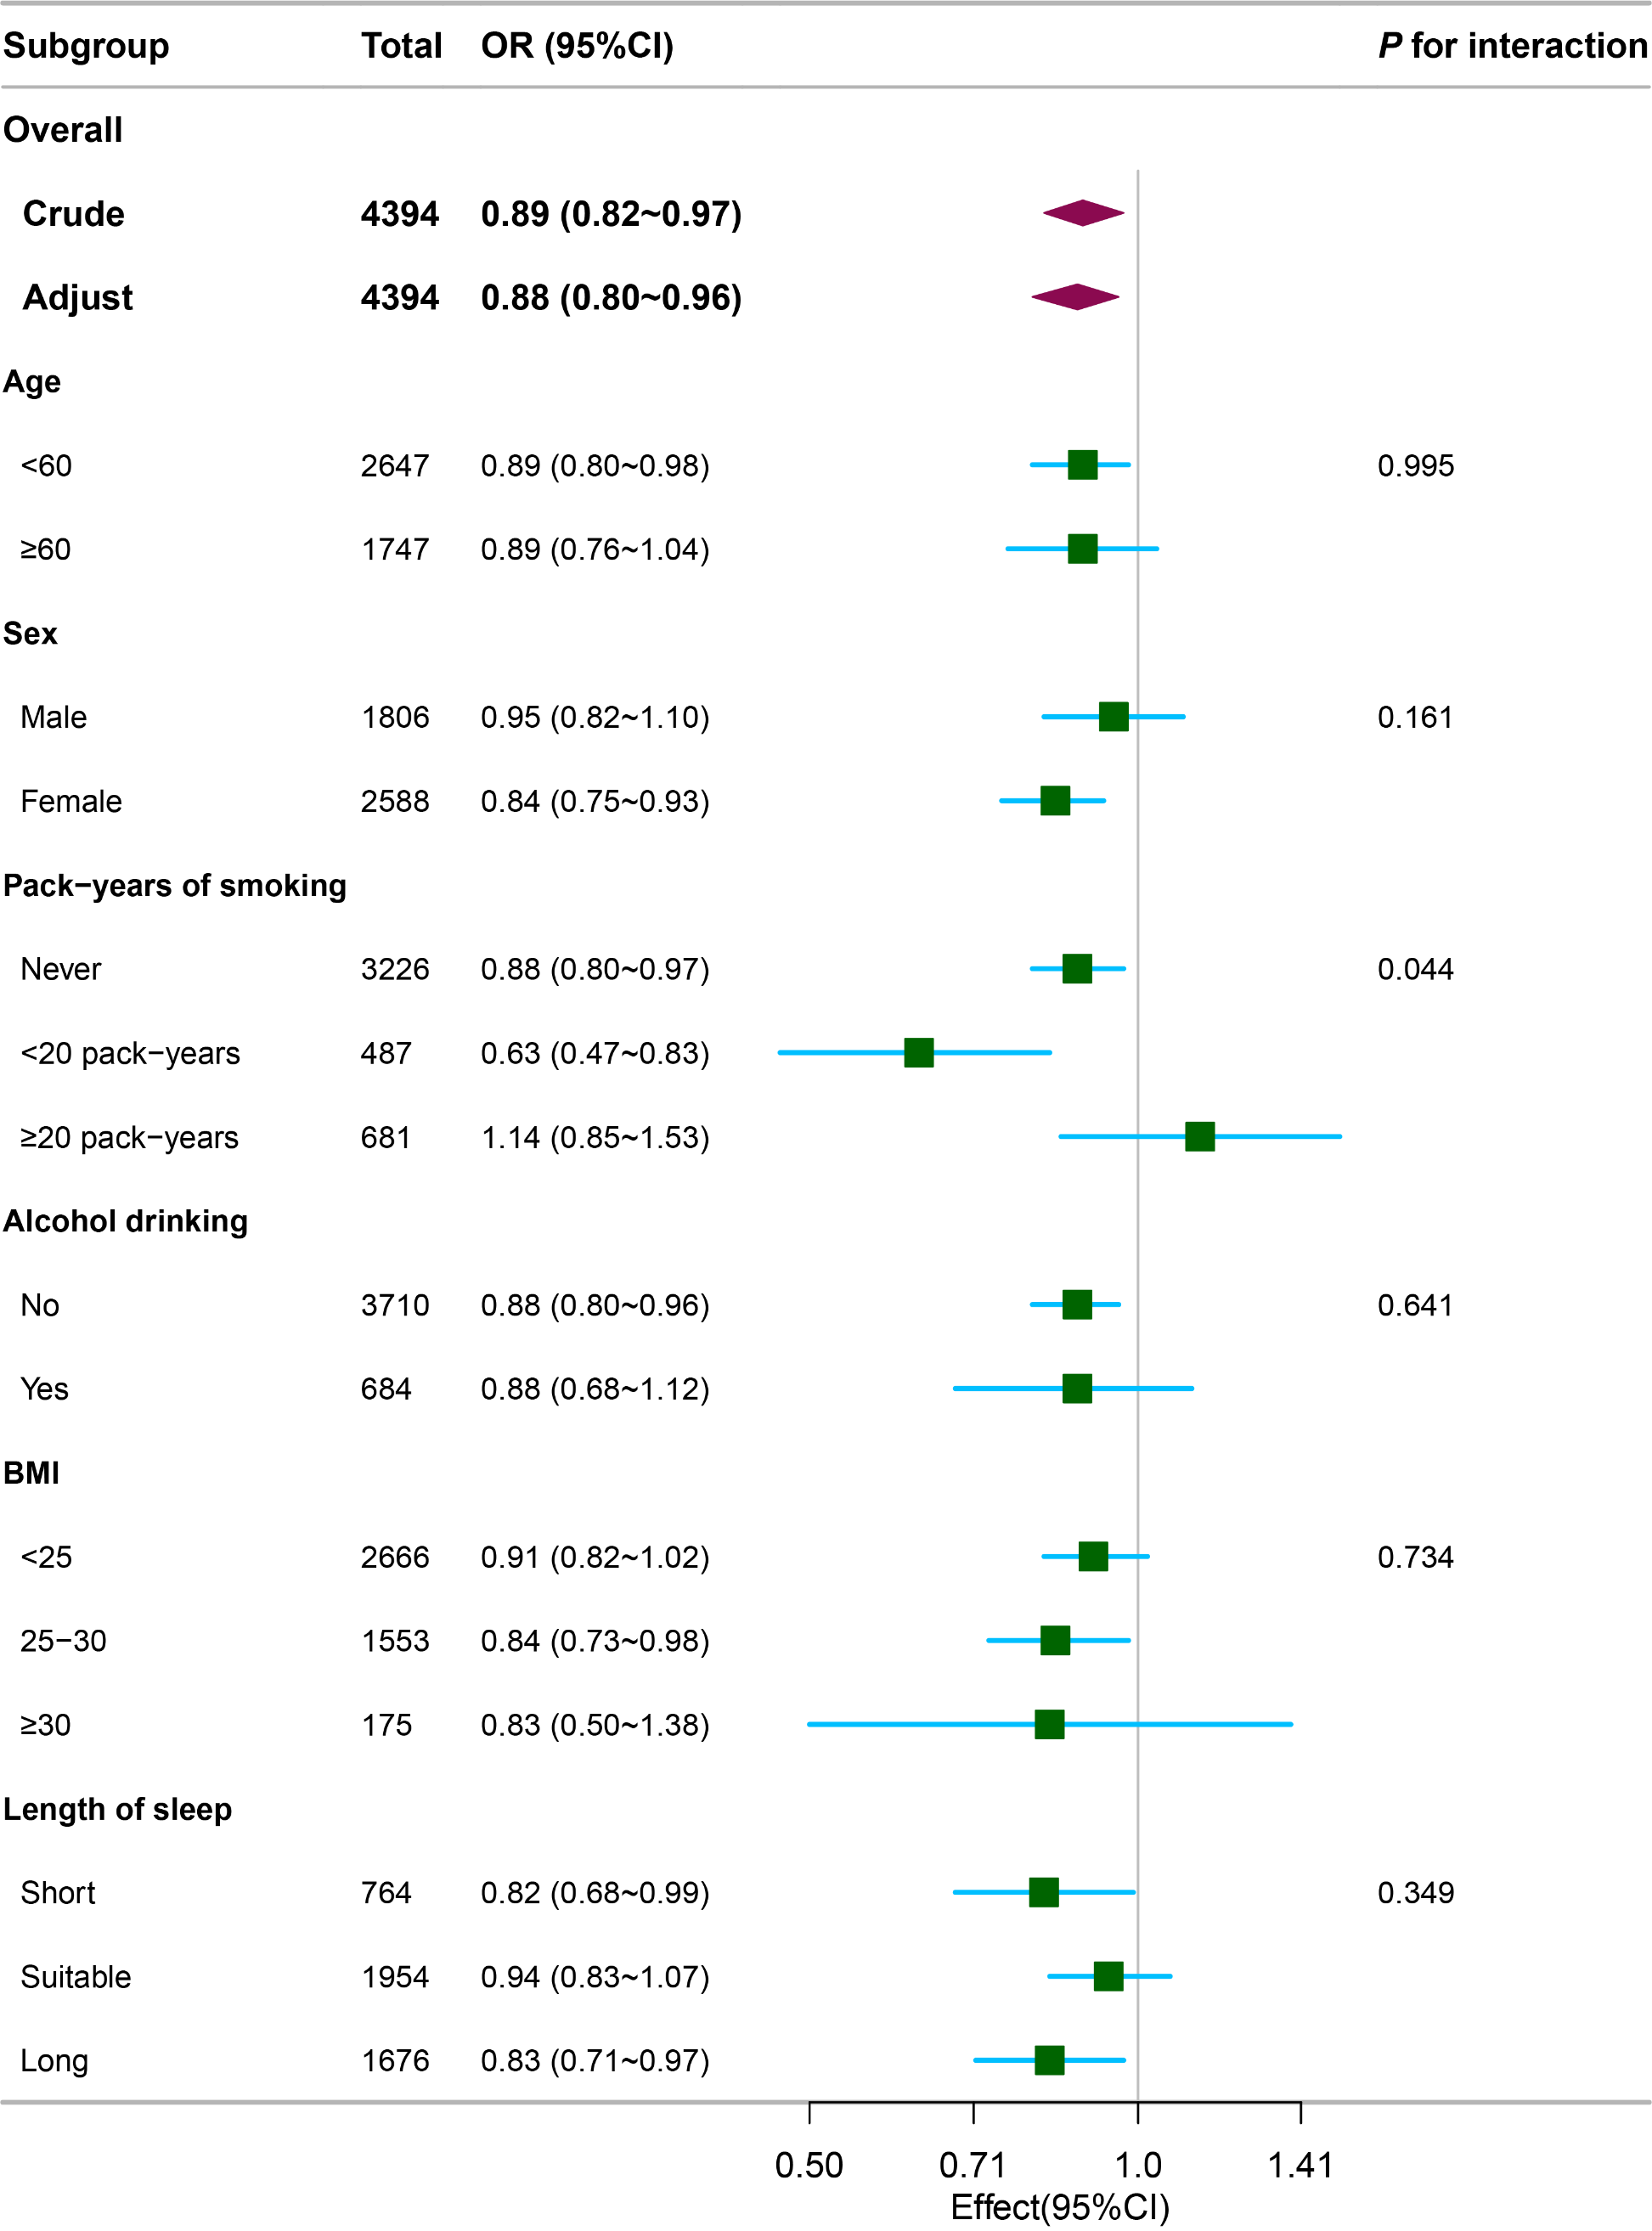


**Figure S3** Association between LTPA and anxiety.

Each stratification was adjusted for age, sex, marital status, education, BMI, length of sleep, pack-years of smoking, alcohol drinking, psychological stress, hypertension, diabetes, heart disease, MLR except the stratification factor itself. Bold font indicates the overall effect and each subgroup itself.
